# Supplementary material for: Quantifying predictability of sequential recommendation via logical constraints
Source: Springer Nature journal article supplement (doi:10.1007/s11704-022-2223-1), 2022-12-24
Supplement: 11704_2022_2223_MOESM1_ESM.pdf [file 11704_2022_2223_MOESM1_ESM.pdf]

# Quantifying predictability of sequential recommendation via logical constraints

**En XU, Zhiwen YU, Nuo LI, Helei CUI, Lina YAO,  
Bin GUO**

Frontiers of Computer Science, DOI: [10.1007/s11704-022-2223-1](https://doi.org/10.1007/s11704-022-2223-1)

# Problems & Ideas

- Problems of quantifying the predictability of sequential recommendation:
  - The behavior candidates' size  $N$  is an essential metric in the predictability calculation.
  - Existing methods have significant bias in calculating  $N$  in the sequential recommendation.
- Ideas: A method to qualify  $N$  by logical constraints can handle the computation of  $N$  in sequential recommendation.

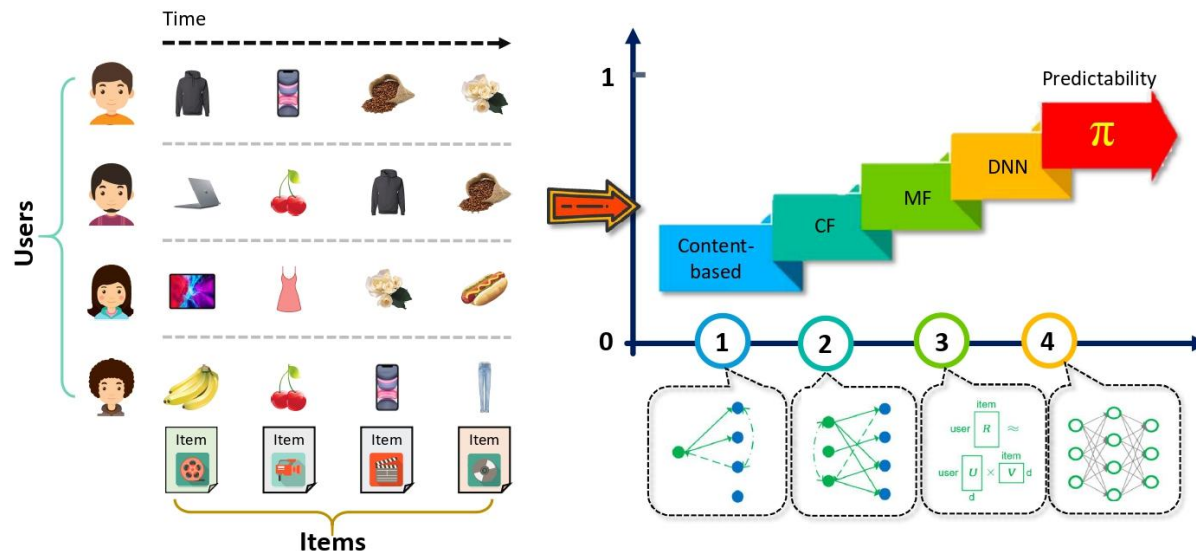

New algorithms are constantly being developed to improve accuracy in sequential recommendation, but what is the highest accuracy, i.e., predictability?

# Main Contributions

- Contributions:
  - A method to qualify  $N$  by logical constraints can handle sequential recommendation in which the set of items is extremely large and new items keep appearing;
  - A method obtains the  $N$  by correlating the user's next item with the historical items, which is computed quickly;
  - A method obtains the  $N$  by analyzing how many candidate items  $N$  can determine the next item, which is computed accurately.

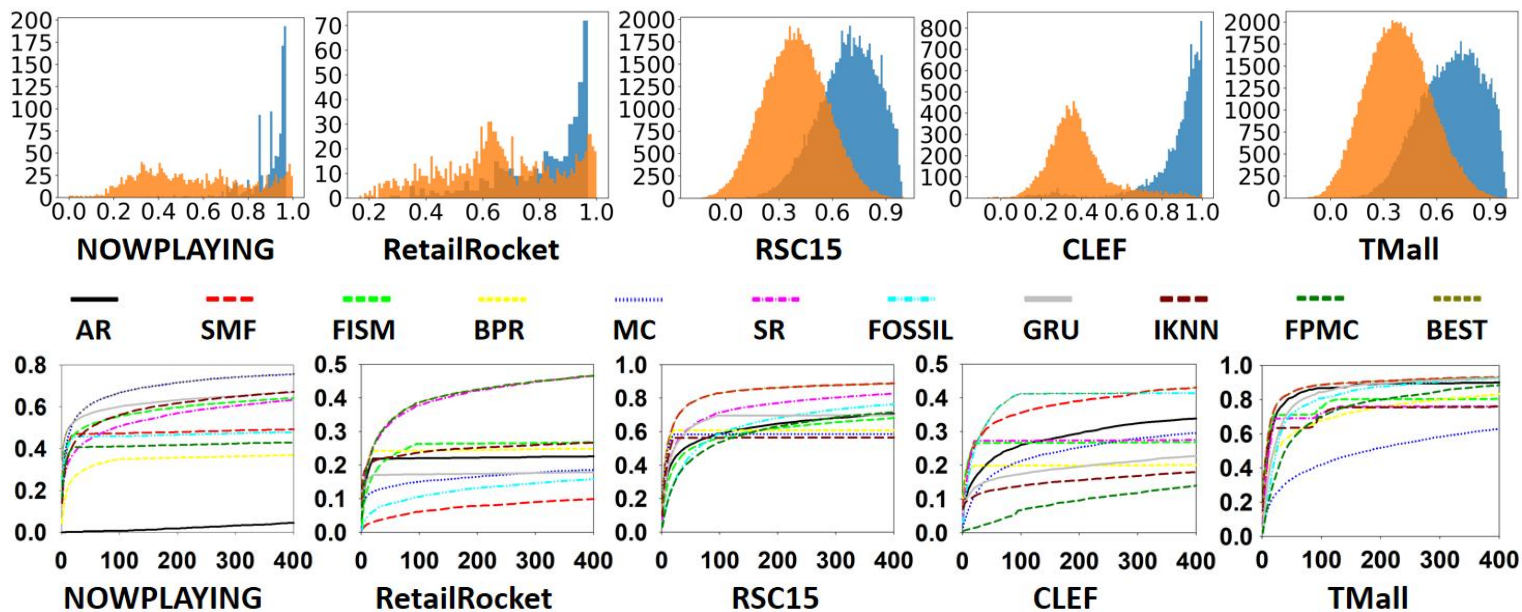

(Top) use the difference in similarity between the historical items and the next item. (Bottom) analyze how large  $N$  can determine the next item. The two methods focus on speed and accuracy to get  $N$ , respectively.
